# Supplementary material for: Assessing the simulated soil thermal regime from Noah-MPLSM v1.1 for near-surface permafrost modeling on the Qinghai-Tibet Plateau
Source: Copernicus journal article supplement (doi:10.5194/gmd-2020-142), 2020-06-30
Supplement: Supplementary file 1 [file gmd-2020-142-supplement.pdf]

*Supplement of*

**Assessing the simulated soil thermal regime from Noah-MP LSM  
v1.1 for near-surface permafrost modeling on the Qinghai-Tibet  
Plateau**

**Xiangfei Li et al.**

*Correspondence to:* Tonghua Wu (thuawu@lzb.ac.cn)

Content: Figures S1-S4

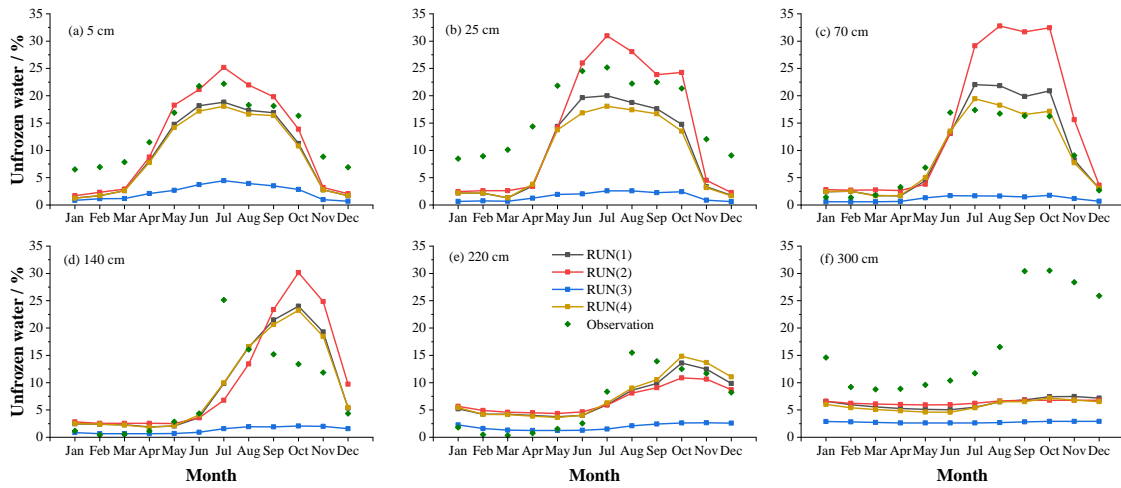

**Figure. S1** Monthly unfrozen water at (a) 5 cm, (b) 25 cm, (c) 70 cm, (d) 140 cm, (e) 220 cm, (f) 300 cm for the RUN process.

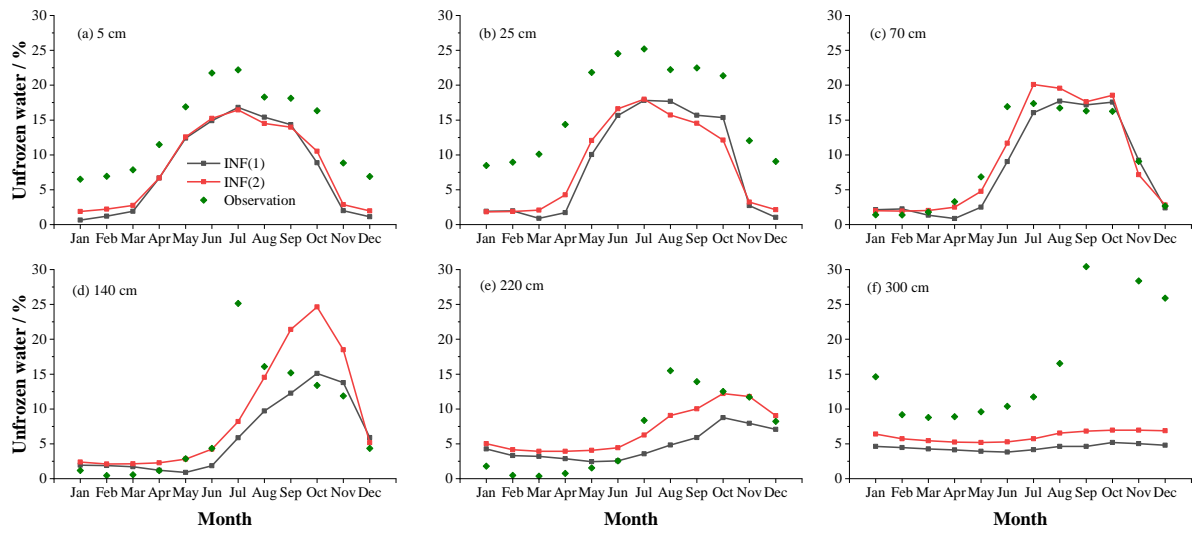

**Figure. S2** Monthly unfrozen water at (a) 5 cm, (b) 25 cm, (c) 70 cm, (d) 140 cm, (e) 220 cm, (f) 300 cm for the INF process.

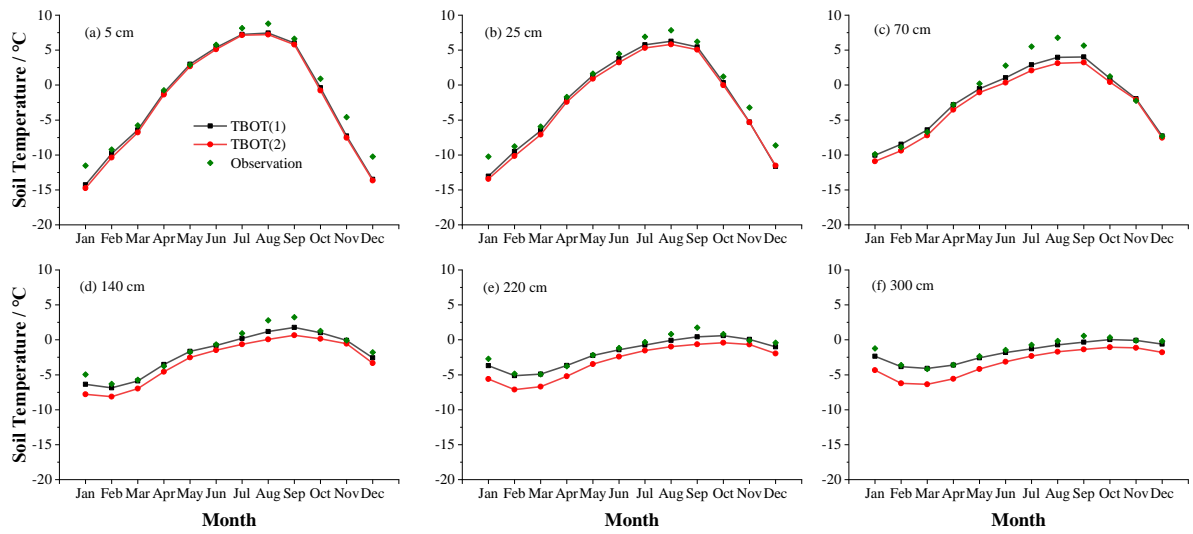

**Figure. S3** Monthly soil temperature at (a) 5 cm, (b) 25 cm, (c) 70 cm, (d) 140 cm, (e) 220 cm, (f) 300 cm for the TBOT process.

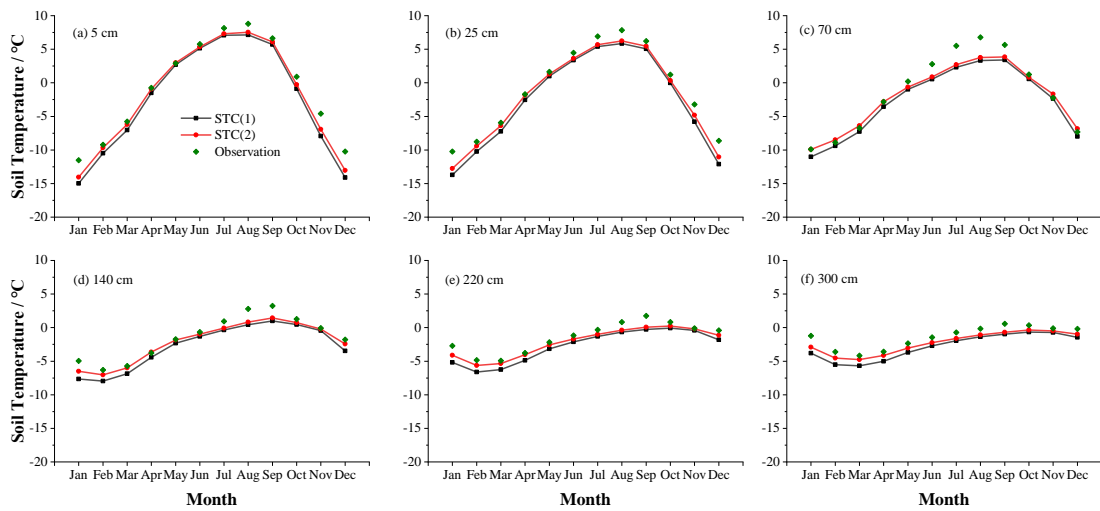

**Figure. S4** Monthly soil temperature at (a) 5 cm, (b) 25 cm, (c) 70 cm, (d) 140 cm, (e) 220 cm, (f) 300 cm for the STC process.
